# Supplementary material
Source: PubMed Central journal article supplement (PMC4913784)
Supplement: NIHMS794163-supplement-supplement_1.pdf [file NIHMS794163-supplement-supplement_1.pdf]

**A. expanded version of Fig. 1D**

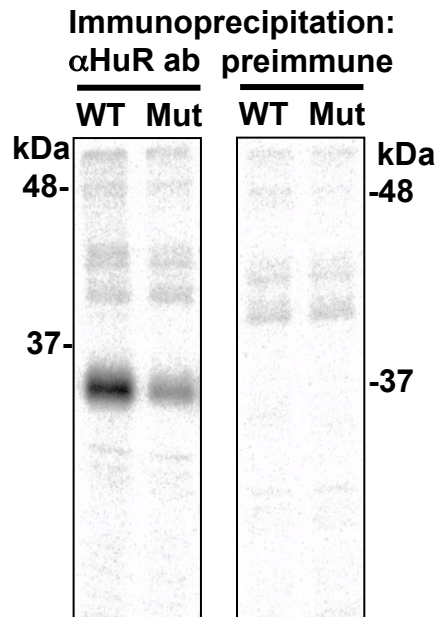

**B. Western blot of extracts in Fig. 1E, F**

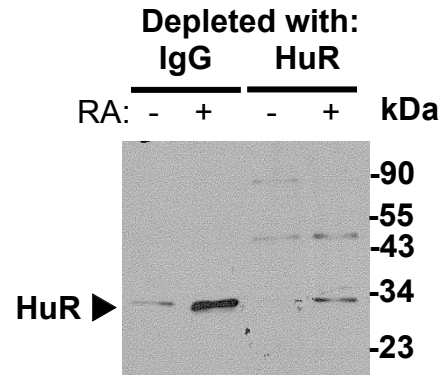

**C. expanded version of Fig. 1E**

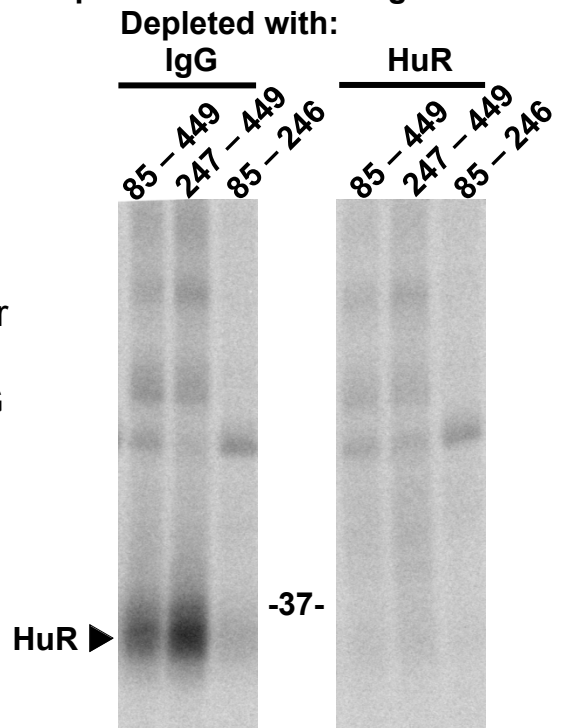

**Supplemental Figure 1.**

**A.** HeLa extracts were incubated with radiolabeled wild type mouse (WT) RNA (nt. 85 to 449) or an RNA with its ARE mutated (MT) as shown in panel A. After UV crosslinking, the extracts were immunoprecipitated with preimmune IgG or with anti-HuR antibody (Santa Cruz, sc5261). **B.** Extracts from untreated or retinoid treated F9 cells were immunodepleted with anti-HuR antibody or preimmune IgG, then electrophoresed, blotted, and probed with HuR antibody. **C.** These immunodepleted extracts were UV cross-linked to BMP2 RNA, and then immunoprecipitated with the HuR antibody. This experiment shows that the anti-HuR antibody fully immunodepleted HuR.
